# Supplementary material for: Human-Robot Joint Misalignment, Physical Interaction, and Gait Kinematic Assessment in Ankle-Foot Orthoses
Source: MDPI journal article supplement (doi:10.3390/s24010246), 2023-12-31
Supplement: s1 [file s1]

# Human-Robot Joint Misalignment, Physical Interaction, and Gait Kinematic Assessment in Ankle-Foot Orthoses

## Supplementary File S2 – Questionnaire Scores

Table S1. Questionnaire scores per participant and AFO, including average scores and pairwise comparisons.

| Subject ID | AFO Model | Q1 | Q2 | Q3 | Q4 | Q5 | Q6 | Q7 | Q8 | Q9 | Q10 | Q11 | Q12 | Q13 | CSD-OPUS Score (Max 32) | Total Score (Max 52) |
|------------|-----------|----|----|----|----|----|----|----|----|----|-----|-----|-----|-----|-------------------------|----------------------|
| 1          | H2-AFO    | 2  | 2  | 2  | 2  | 2  | 2  | 2  | 3  | 3  | 3   | 2   | 3   | 3   | 18                      | 31                   |
|            | SOF-AFO   | 2  | 3  | 3  | 3  | 3  | 3  | 3  | 3  | 2  | 3   | 3   | 3   | 3   | 23                      | 37                   |
|            | SOL-AFO   | 2  | 3  | 2  | 3  | 3  | 2  | 3  | 3  | 2  | 3   | 2   | 3   | 3   | 21                      | 34                   |
| 2          | H2-AFO    | 4  | 3  | 3  | 3  | 3  | 4  | 4  | 2  | 3  | 3   | 3   | 3   | 3   | 27                      | 41                   |
|            | SOF-AFO   | 4  | 4  | 1  | 2  | 3  | 4  | 4  | 4  | 1  | 2   | 4   | 3   | 3   | 26                      | 39                   |
|            | SOL-AFO   | 4  | 4  | 4  | 4  | 4  | 4  | 3  | 3  | 3  | 3   | 1   | 3   | 3   | 26                      | 43                   |
| 3          | H2-AFO    | 4  | 3  | 0  | 3  | 3  | 4  | 3  | 4  | 4  | 4   | 4   | 3   | 4   | 28                      | 43                   |
|            | SOF-AFO   | 4  | 4  | 4  | 4  | 3  | 4  | 4  | 4  | 4  | 4   | 4   | 4   | 4   | 31                      | 51                   |
|            | SOL-AFO   | 3  | 3  | 3  | 3  | 3  | 2  | 4  | 3  | 3  | 3   | 4   | 4   | 3   | 26                      | 41                   |
| 4          | H2-AFO    | 3  | 3  | 3  | 3  | 2  | 3  | 3  | 2  | 3  | 3   | 3   | 3   | 3   | 23                      | 37                   |
|            | SOF-AFO   | 4  | 3  | 3  | 3  | 2  | 3  | 3  | 4  | 3  | 3   | 4   | 3   | 3   | 25                      | 41                   |
|            | SOL-AFO   | 3  | 3  | 2  | 2  | 3  | 2  | 3  | 3  | 3  | 3   | 2   | 4   | 3   | 22                      | 36                   |
| 5          | H2-AFO    | 4  | 3  | 3  | 3  | 4  | 4  | 4  | 3  | 3  | 3   | 4   | 4   | 4   | 30                      | 46                   |
|            | SOF-AFO   | 4  | 4  | 3  | 4  | 4  | 4  | 4  | 4  | 4  | 4   | 3   | 4   | 4   | 31                      | 50                   |
|            | SOL-AFO   | 4  | 4  | 4  | 3  | 4  | 4  | 4  | 4  | 4  | 4   | 4   | 3   | 4   | 30                      | 50                   |
| 6          | H2-AFO    | 3  | 2  | 4  | 3  | 3  | 3  | 3  | 4  | 4  | 3   | 3   | 2   | 3   | 23                      | 40                   |
|            | SOF-AFO   | 3  | 4  | 3  | 3  | 3  | 4  | 3  | 4  | 2  | 3   | 4   | 4   | 4   | 27                      | 44                   |
|            | SOL-AFO   | 3  | 4  | 2  | 3  | 3  | 4  | 2  | 4  | 2  | 2   | 4   | 4   | 4   | 25                      | 41                   |
| 7          | H2-AFO    | 2  | 3  | 3  | 3  | 3  | 4  | 4  | 3  | 3  | 3   | 2   | 3   | 4   | 24                      | 40                   |
|            | SOF-AFO   | 3  | 4  | 3  | 3  | 3  | 3  | 4  | 4  | 4  | 4   | 3   | 4   | 4   | 27                      | 46                   |
|            | SOL-AFO   | 2  | 4  | 2  | 3  | 3  | 3  | 3  | 4  | 2  | 3   | 3   | 3   | 2   | 23                      | 37                   |

|          |            |      |      |      |      |      |      |      |      |      |      |      |      |      |       |       |
|----------|------------|------|------|------|------|------|------|------|------|------|------|------|------|------|-------|-------|
| 8        | H2-AFO     | 3    | 3    | 3    | 3    | 3    | 3    | 3    | 3    | 3    | 3    | 3    | 3    | 2    | 24    | 38    |
|          | SOF-AFO    | 4    | 4    | 4    | 4    | 4    | 4    | 4    | 4    | 4    | 4    | 3    | 3    | 4    | 30    | 50    |
|          | SOL-AFO    | 1    | 3    | 1    | 2    | 3    | 1    | 3    | 4    | 2    | 2    | 3    | 4    | 4    | 19    | 33    |
| 9        | H2-AFO     | 4    | 1    | 1    | 1    | 1    | 4    | 3    | 1    | 2    | 1    | 3    | 4    | 2    | 21    | 28    |
|          | SOF-AFO    | 4    | 3    | 3    | 3    | 3    | 4    | 4    | 3    | 3    | 3    | 4    | 4    | 3    | 29    | 44    |
|          | SOL-AFO    | 4    | 3    | 3    | 3    | 3    | 3    | 4    | 3    | 2    | 2    | 3    | 4    | 3    | 26    | 40    |
| 10       | H2-AFO     | 4    | 2    | 2    | 2    | 3    | 3    | 4    | 3    | 2    | 2    | 3    | 2    | 2    | 23    | 34    |
|          | SOF-AFO    | 4    | 4    | 4    | 4    | 4    | 4    | 4    | 4    | 4    | 4    | 4    | 3    | 4    | 31    | 51    |
|          | SOL-AFO    | 4    | 4    | 3    | 3    | 3    | 3    | 4    | 3    | 3    | 3    | 2    | 2    | 3    | 24    | 40    |
| Average  | H2-AFO     | 3.30 | 2.50 | 2.40 | 2.60 | 2.70 | 3.40 | 3.30 | 2.80 | 3.00 | 2.80 | 3.00 | 3.00 | 3.00 | 24.10 | 37.80 |
|          | SOF-AFO    | 3.60 | 3.70 | 3.10 | 3.30 | 3.20 | 3.70 | 3.70 | 3.80 | 3.10 | 3.40 | 3.60 | 3.50 | 3.60 | 28.00 | 45.30 |
|          | SOL-AFO    | 3.00 | 3.50 | 2.60 | 2.90 | 3.20 | 2.80 | 3.30 | 3.40 | 2.60 | 2.80 | 2.80 | 3.40 | 3.20 | 24.20 | 39.50 |
| Pairwise | SOF vs H2  | 0.30 | 1.20 | 0.70 | 0.70 | 0.50 | 0.30 | 0.40 | 1.00 | 0.10 | 0.60 | 0.60 | 0.50 | 0.60 | 3.90  | 7.50  |
|          | SOF vs SOL | 0.60 | 0.20 | 0.50 | 0.40 | 0.00 | 0.90 | 0.40 | 0.40 | 0.50 | 0.60 | 0.80 | 0.10 | 0.40 | 3.80  | 5.80  |

| Subject ID | AFO Model | Q1 | Q2 | Q3 | Q4 | Q5 | Q6 | Q7 | Q8 | Q9 | Q10 | Q11 | Q12 | Q13 | CSD-OPUS Score (Max 32) | Total Score (Max 52) |
|------------|-----------|----|----|----|----|----|----|----|----|----|-----|-----|-----|-----|-------------------------|----------------------|
| 1          | H2-AFO    | 2  | 2  | 2  | 2  | 2  | 2  | 2  | 3  | 3  | 3   | 2   | 3   | 3   | 18                      | 31                   |
|            | SOF-AFO   | 2  | 3  | 3  | 3  | 3  | 3  | 3  | 3  | 2  | 3   | 3   | 3   | 3   | 23                      | 37                   |
|            | SOL-AFO   | 2  | 3  | 2  | 3  | 3  | 2  | 3  | 3  | 2  | 3   | 2   | 3   | 3   | 21                      | 34                   |
| 2          | H2-AFO    | 4  | 3  | 3  | 3  | 3  | 4  | 4  | 2  | 3  | 3   | 3   | 3   | 3   | 27                      | 41                   |
|            | SOF-AFO   | 4  | 4  | 1  | 2  | 3  | 4  | 4  | 4  | 1  | 2   | 4   | 3   | 3   | 26                      | 39                   |
|            | SOL-AFO   | 4  | 4  | 4  | 4  | 4  | 4  | 3  | 3  | 3  | 3   | 1   | 3   | 3   | 26                      | 43                   |
| 3          | H2-AFO    | 4  | 3  | 0  | 3  | 3  | 4  | 3  | 4  | 4  | 4   | 4   | 3   | 4   | 28                      | 43                   |
|            | SOF-AFO   | 4  | 4  | 4  | 4  | 3  | 4  | 4  | 4  | 4  | 4   | 4   | 4   | 4   | 31                      | 51                   |
|            | SOL-AFO   | 3  | 3  | 3  | 3  | 3  | 2  | 4  | 3  | 3  | 3   | 4   | 4   | 3   | 26                      | 41                   |
| 4          | H2-AFO    | 3  | 3  | 3  | 3  | 2  | 3  | 3  | 2  | 3  | 3   | 3   | 3   | 3   | 23                      | 37                   |
|            | SOF-AFO   | 4  | 3  | 3  | 3  | 2  | 3  | 3  | 4  | 3  | 3   | 4   | 3   | 3   | 25                      | 41                   |
|            | SOL-AFO   | 3  | 3  | 2  | 2  | 3  | 2  | 3  | 3  | 3  | 3   | 2   | 4   | 3   | 22                      | 36                   |
| 5          | H2-AFO    | 4  | 3  | 3  | 3  | 4  | 4  | 4  | 3  | 3  | 3   | 4   | 4   | 4   | 30                      | 46                   |
|            | SOF-AFO   | 4  | 4  | 3  | 4  | 4  | 4  | 4  | 4  | 4  | 4   | 3   | 4   | 4   | 31                      | 50                   |
|            | SOL-AFO   | 4  | 4  | 4  | 3  | 4  | 4  | 4  | 4  | 4  | 4   | 4   | 3   | 4   | 30                      | 50                   |
| 6          | H2-AFO    | 3  | 2  | 4  | 3  | 3  | 3  | 3  | 4  | 4  | 3   | 3   | 2   | 3   | 23                      | 40                   |
|            | SOF-AFO   | 3  | 4  | 3  | 3  | 3  | 4  | 3  | 4  | 2  | 3   | 4   | 4   | 4   | 27                      | 44                   |
|            | SOL-AFO   | 3  | 4  | 2  | 3  | 3  | 4  | 2  | 4  | 2  | 2   | 4   | 4   | 4   | 25                      | 41                   |
| 7          | H2-AFO    | 2  | 3  | 3  | 3  | 3  | 4  | 4  | 3  | 3  | 3   | 2   | 3   | 4   | 24                      | 40                   |
|            | SOF-AFO   | 3  | 4  | 3  | 3  | 3  | 3  | 4  | 4  | 4  | 4   | 3   | 4   | 4   | 27                      | 46                   |
|            | SOL-AFO   | 2  | 4  | 2  | 3  | 3  | 3  | 3  | 4  | 2  | 3   | 3   | 3   | 2   | 23                      | 37                   |
| 8          | H2-AFO    | 3  | 3  | 3  | 3  | 3  | 3  | 3  | 3  | 3  | 3   | 3   | 3   | 2   | 24                      | 38                   |
|            | SOF-AFO   | 4  | 4  | 4  | 4  | 4  | 4  | 4  | 4  | 4  | 4   | 3   | 3   | 4   | 30                      | 50                   |
|            | SOL-AFO   | 1  | 3  | 1  | 2  | 3  | 1  | 3  | 4  | 2  | 2   | 3   | 4   | 4   | 19                      | 33                   |
| 9          | H2-AFO    | 4  | 1  | 1  | 1  | 1  | 4  | 3  | 1  | 2  | 1   | 3   | 4   | 2   | 21                      | 28                   |
|            | SOF-AFO   | 4  | 3  | 3  | 3  | 3  | 4  | 4  | 3  | 3  | 3   | 4   | 4   | 3   | 29                      | 44                   |
|            | SOL-AFO   | 4  | 3  | 3  | 3  | 3  | 3  | 4  | 3  | 2  | 2   | 3   | 4   | 3   | 26                      | 40                   |
| 10         | H2-AFO    | 4  | 2  | 2  | 2  | 3  | 3  | 4  | 3  | 2  | 2   | 3   | 2   | 2   | 23                      | 34                   |

|                 |            |      |      |      |      |      |      |      |      |      |      |      |      |      |       |       |
|-----------------|------------|------|------|------|------|------|------|------|------|------|------|------|------|------|-------|-------|
|                 | SOF-AFO    | 4    | 4    | 4    | 4    | 4    | 4    | 4    | 4    | 4    | 4    | 4    | 3    | 4    | 31    | 51    |
|                 | SOL-AFO    | 4    | 4    | 3    | 3    | 3    | 3    | 4    | 3    | 3    | 3    | 2    | 2    | 3    | 24    | 40    |
| <b>Average</b>  | H2-AFO     | 3.30 | 2.50 | 2.40 | 2.60 | 2.70 | 3.40 | 3.30 | 2.80 | 3.00 | 2.80 | 3.00 | 3.00 | 3.00 | 24.10 | 37.80 |
|                 | SOF-AFO    | 3.60 | 3.70 | 3.10 | 3.30 | 3.20 | 3.70 | 3.70 | 3.80 | 3.10 | 3.40 | 3.60 | 3.50 | 3.60 | 28.00 | 45.30 |
|                 | SOL-AFO    | 3.00 | 3.50 | 2.60 | 2.90 | 3.20 | 2.80 | 3.30 | 3.40 | 2.60 | 2.80 | 2.80 | 3.40 | 3.20 | 24.20 | 39.50 |
| <b>Pairwise</b> | SOF vs H2  | 0.30 | 1.20 | 0.70 | 0.70 | 0.50 | 0.30 | 0.40 | 1.00 | 0.10 | 0.60 | 0.60 | 0.50 | 0.60 | 3.90  | 7.50  |
|                 | SOF vs SOL | 0.60 | 0.20 | 0.50 | 0.40 | 0.00 | 0.90 | 0.40 | 0.40 | 0.50 | 0.60 | 0.80 | 0.10 | 0.40 | 3.80  | 5.80  |
